# Supplementary material for: Comparative genomics-based investigation of resequencing targets in Vibrio fischeri: Focus on point miscalls and artefactual expansions
Source: Springer Nature journal article supplement (doi:10.1186/1471-2164-9-138), 2008-01-01
Supplement: Additional file 5 [file 1471-2164-9-138-s5.pdf]

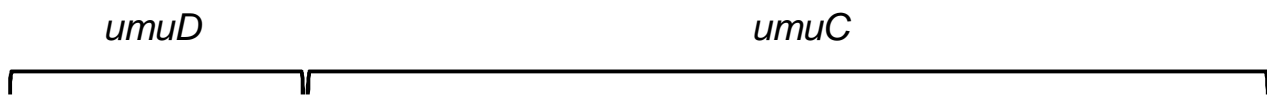

**ES114**

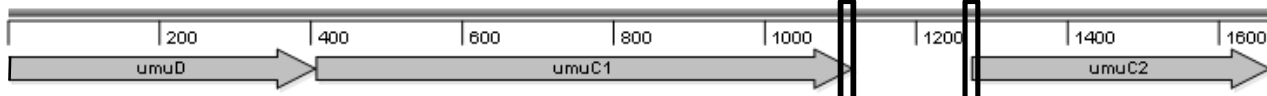

**MJ11**

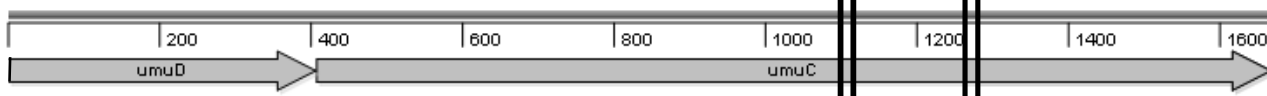

**ES114**  
**MJ11**

...TAG...  
...TGG...

...CTT TGCTT TGCTT TGCTT CAAA ...  
...CTT TGCTT TGCTT ----- CAAA ...
